# Supplementary material for: PPARG is central to the initiation and propagation of human angiomyolipoma, suggesting its potential as a therapeutic target
Source: PubMed Central journal article supplement (PMC5376758; doi:10.15252/emmm.201506111), 2017-03-08
Supplement: EMMM-9-508-s001.pdf [file EMMM-9-508-s001.pdf]

# PPARG IS CENTRAL TO THE INITIATION AND PROPAGATION OF HUMAN ANGIOMYOLIPOMA, SUGGESTING ITS POTENTIAL AS A THERAPEUTIC TARGET

## Table of Contents

|                             |    |
|-----------------------------|----|
| Supplementary methods ..... | 2  |
| Supplementary figures ..... | 5  |
| Appendix Figure S1 .....    | 5  |
| Appendix Figure S2 .....    | 6  |
| Appendix Figure S3 .....    | 7  |
| Appendix Figure S4 .....    | 8  |
| Appendix Figure S5 .....    | 9  |
| Appendix Figure S6 .....    | 11 |
| Appendix Figure S7 .....    | 11 |
| Appendix Figure S8 .....    | 12 |
| Appendix Figure S9 .....    | 14 |
| Appendix Figure S10 .....   | 15 |
| Appendix Figure S11 .....   | 16 |
| Supplementary tables .....  | 17 |
| Appendix Table S1 .....     | 17 |
| Appendix Table S2 .....     | 18 |
| Appendix Table S3 .....     | 20 |
| Appendix Table S4 .....     | 21 |
| Appendix Table S5 .....     | 22 |
| Appendix Table S6 .....     | 24 |
| Appendix Table S7 .....     | 25 |
| Appendix Table S8 .....     | 26 |

## Supplementary methods

### *Hematoxylin and eosin (H&E) staining*

5 µm sections of paraffin-embedded Xn tissues were mounted on super frost/plus glass and incubated at 60°C for 40 minutes. After de-paraffinization, slides were incubated in Mayer's Hematoxylin solution (Sigma-Aldrich) and incubated with 1% Hydrochloric acid in 70% ethanol for 1 minute. Slides were then incubated for 10 seconds in Eosin (Sigma-Aldrich). Images were produced using Olympus BX51TF fluorescent microscope with Olympus DP72 camera and cellSens standard software.

### *Immunohistochemical (IHC) and immunofluorescent (IF) staining of paraffin-embedded Xn tissues*

Sections were pre-treated using OmniPrep solution (Zytomed Systems) in 95°C for 1 hour according to the manufacturer's protocol. For IHC, blocking was performed using Cas-Block solution (Invitrogen) for 20 minutes followed by 1 hour of incubation at room temperature (RT) with primary antibodies for HLA,  $\alpha$ -SMA, CD31, HMB-45, PPAR $\gamma$  and pS6 (**Appendix Table S6**). Samples were incubated with secondary antibodies (ImmPRESS<sup>TM</sup> anti mouse/rabbit reagent peroxidase, Vector labs) for 30 minutes at RT and detected using ImmPACT DAB kit (Vector) according to the manufacturer's protocol. Hematoxylin was used for counterstaining. For IF, sections were blocked with Cas-Block solution (Invitrogen) for 1 hour followed by incubation with primary antibodies for HLA and CD31 (**Appendix Table S6**) and then washed and incubated with secondary antibodies (**Appendix Table S7**) for 1 hour. Mounting containing DAPI (Southern Biotech) was applied. Photos were obtained using Olympus BX51TF fluorescent microscope with Olympus DP72 camera and cellSens standard software.

### *IF staining of cells*

Cells were grown on coverslips in 24-well culture dishes overnight, after which they were washed with PBS, fixed in 3% paraformaldehyde (PFA) for 10 minutes at RT and washed with PBS 3 times for 5 minutes at RT. The cells were next permeabilized for 5 minutes with 0.2% (vol/vol) Triton X-100 in PBS at RT, washed 3 times with PBST (PBS with 0.05% Tween-20)

for 5 minutes and then blocked with Cas-Block solution (Invitrogen) for 1 hour at RT. Next, the cells were incubated with the primary antibody (PPAR $\gamma$ , Santa-Cruz, and  $\beta$ -Actin, Cell signaling) for 1 hour at RT, washed 3 times with PBST, incubated with the secondary antibody (as described above) for 1 hour at RT and washed three times with PBST. Finally, mounting with DAPI (Southern Biotech) was applied. Photos were obtained using Olympus BX51TF fluorescent microscope with Olympus DP72 camera and cellSens standard software.

#### *Flow Cytometry*

$10^5$  Cells were suspended in FACS buffer (0.5% BSA, 2 mM EDTA in  $1\times$  PBS) and blocked with FcR blocking reagent (MiltenyiBiotec) and human serum (1:1). The cells were then incubated with a primary antibody or an isotype control (**Appendix Table S8**). Cells were incubated with a secondary antibody if needed (**Appendix Table S8**). Cell viability was tested using 7AAD viability staining solution (eBioscience). Cell labelling was detected using FACSCalibur (BD Pharmingen). FACS results were analyzed using FlowJo analysis software. For flow cytometry analysis of AML Xn, freshly removed Xn were dissociated into a single cell suspension as described above and immediately analyzed.

#### *Quantitative real-time RT-PCR analysis of gene expression*

Total RNA was isolated using TRIzol reagent (Life Technologies) according to the manufacturer's instructions. cDNA was synthesized using the High Capacity cDNA reverse transcription kit (Applied Biosystems, ABI). Quantitative Real-time RT-PCR (qRT-PCR) was performed using StepOnePlus Real-Time PCR System (ABI) and the specific TaqMan Gene Expression assays for the relevant genes in the presence of TaqMan Fast Universal PCR Master Mix (both from ABI). hHPRT1, hGAPDH and hB2M were used as endogenous controls. The results were analyzed using StepOnePlus Real-time Software in the  $\Delta\Delta$ CT method which determines fold change in gene expression relative to a comparator sample. Statistical analysis was performed using a non-paired 2-tailed t-test. Statistical significance was considered to be p-value  $<0.05$ .

#### *Human FK and AK tissue*

Normal human 16 week gestation kidney was obtained following curettage of elective abortions. Normal human AK samples were retrieved from borders of renal cell carcinoma tumors from patients who underwent partial nephrectomy. Fetal and adult kidney tissues were handled within 1 h following the curettage or nephrectomy procedures, respectively. Collected tissues were washed with cold Hank's Balanced Salt Solution (HBSS) (Invitrogen, Carlsbad, Calif., USA) and cut into 0.5 cm cubes by sterile surgical scalpels. The pieces were then used for total RNA extraction with TRIzol (Life Technologies, Invitrogen, Carlsbad, Calif., USA).

### *Cell Culture*

AML cell lines and Xn cells were grown in DMEM (Invitrogen) supplemented with 10% fetal bovine serum (Invitrogen), 1% Penicillin–streptomycin 100M and 1% L-glutamine (both from Biological Industries). Human AK and FK and WT cells were grown as previously described (Buzhor et al, 2013; Harari-Steinberg et al, 2013; Pode-Shakked et al, 2013). Human bone marrow-derived MSCs were isolated and grown as previously described (Resnick et al, 2013). The cells demonstrated the typical expression of surface markers and differentiated into adipocytes and osteoblasts under appropriate culture conditions (**Appendix Figure S11**).

## Supplementary figures

### Appendix Figure S1

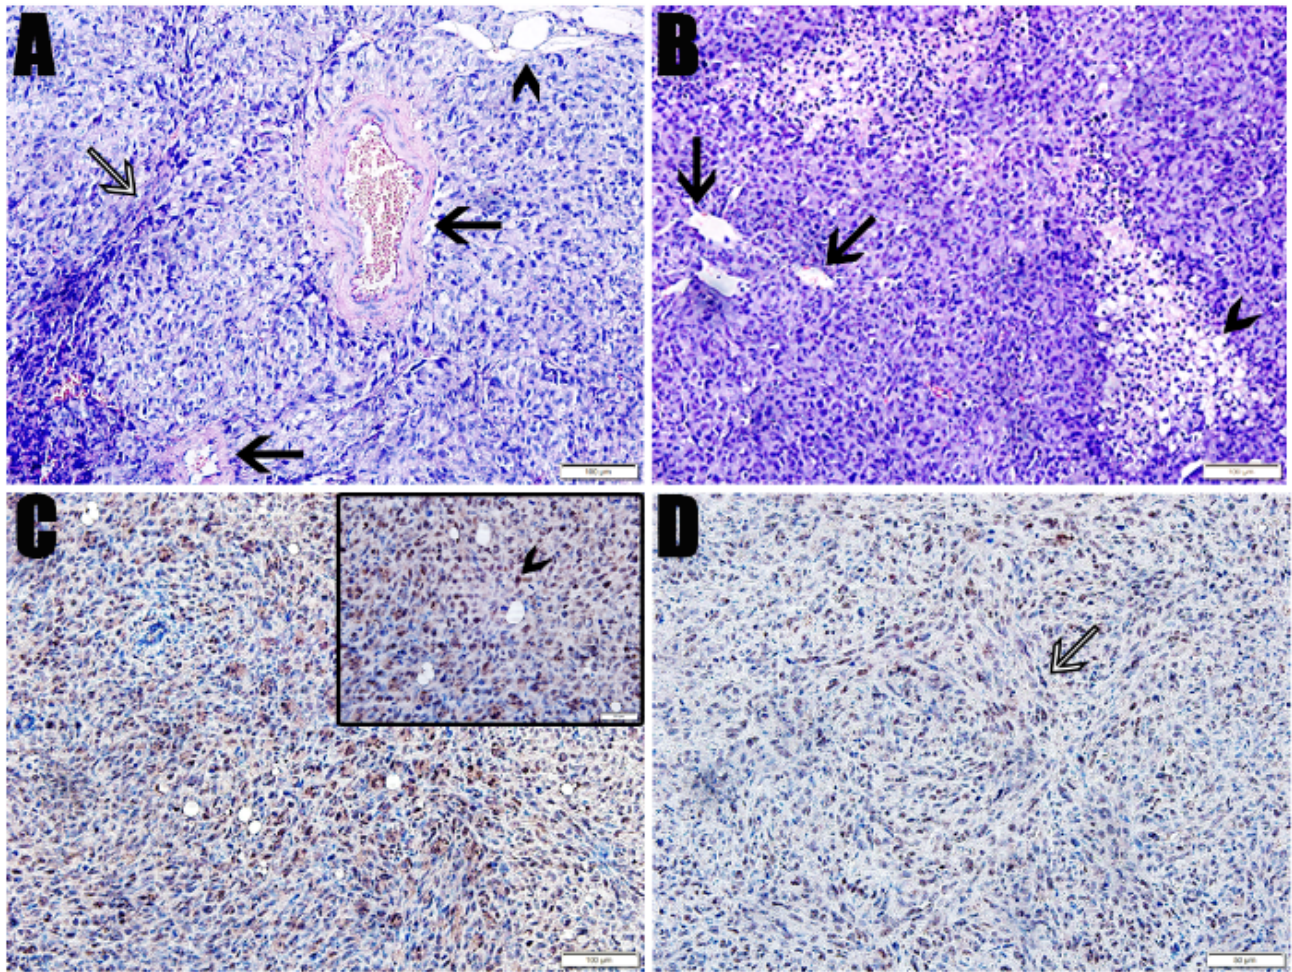

**Appendix Figure S1:** Validation of the human AML-Xn model: Shown are two representative repetitions of the newly established Xn model, entitled UMB2-Xn and UMB3-Xn. Shown is the histology of the 5<sup>th</sup> (T5) generation of Xn in mice. Both UMB2-T5 (**A**) and UMB3-T5 (**B**) demonstrate in H&E staining, the same histological features consistent with the parental tumor, namely the presence of blood vessels (black arrows), adipocytes (arrowheads) and spindle-shaped, early myoid cells (white arrow). In addition, these tumors as well demonstrate strong nuclear expression of PPARG (**C&D**). Notably, PPARG expression PPARG is robustly expressed in the mass of undifferentiated cells of the tumors (**C, insert**). In addition, PPARG is expressed in both adipocytic and myoid cells within the tumors (**D, arrow**). Scale bar: 100  $\mu\text{m}$  (except for insert, 50  $\mu\text{m}$ ).

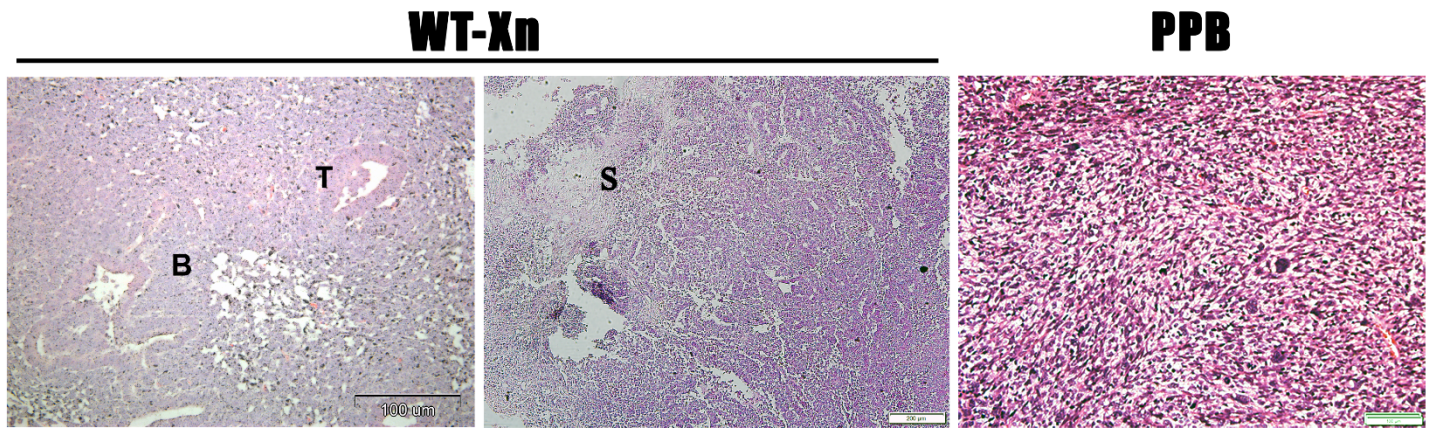

**Appendix Figure S2: H&E staining of Wilms' tumor (WT) and Pleuro-Pulmonary Blastoma:** In order to demonstrate the specificity of the human AML-Xn model, we have characterized Xn tumors of two different tumors: WT and PPB, representing a renal and non-renal tumors. Notably, both Xn models exhibit a significantly different histological appearance compared to the AML-Xn model, which is at the same time reminiscent of the parental neoplasm. WT-Xn (left and middle panels) demonstrate the classical tri-phasic histology, consisting of renal tubules (T), dense blastema (B) and stroma (S). In contrast, PPB-Xn (right panel) exhibit the typical hyper-cellular primitive blastemal-like morphology.

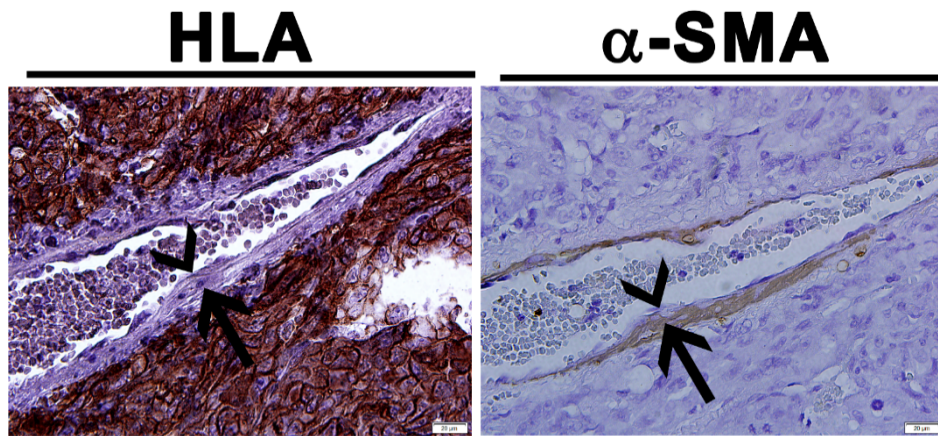

**Appendix Figure S3:** Immunohistochemical staining of T4 (4<sup>th</sup> generation)-xenografts (Xn) for HLA (**Left panel**) and  $\alpha$ -SMA (**Right panel**), demonstrating mouse-derived blood vessels within the human-derived tumor, in which both the endothelial lining (**arrowheads**) and the  $\alpha$ -SMA<sup>+</sup> perivascular cells (**arrows**) are HLA<sup>-</sup>. In contrast, the Xn also harbors vessels in which perivascular cells are of human origin, thus expressing both HLA and  $\alpha$ -SMA (see **Figure 1D**). Shown are sequential sections. Scale bar: 20  $\mu$ m

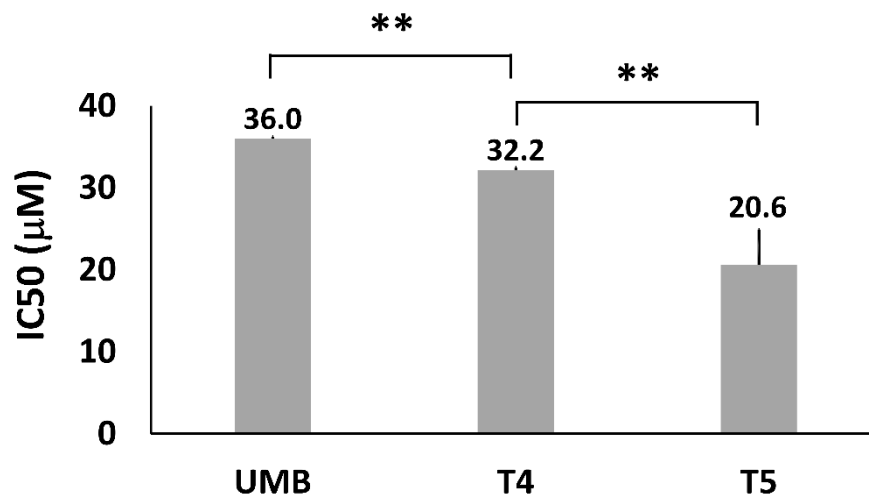

**Appendix Figure S4:** Inhibitory concentration 50 (IC50) of the PPARG inhibitor GW9662 in the AML cell line UMB and subsequent 4<sup>th</sup> and 5<sup>t</sup> generations of Xn tumors (T4 and T5, respectively). Results shown as mean±SD (n=3). \*, p<0.05; \*\*, p<0.01 (2-tailed Student's t test).



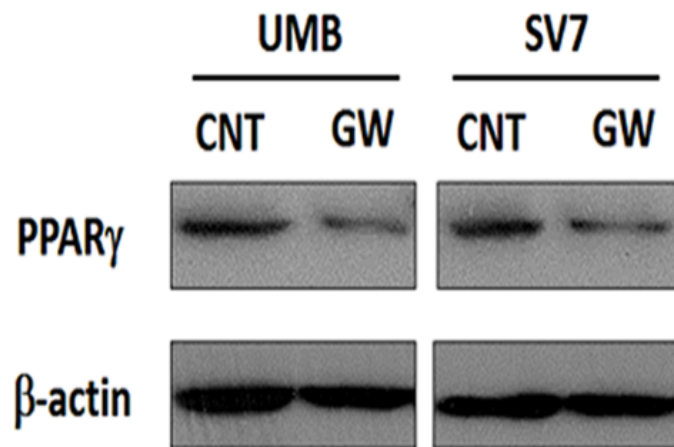

**Appendix Figure S5:** Western blot analysis demonstrating PPAR $\gamma$  expression in UMB and SV7 cells treated with GW9662 (GW) compared to control cells (CNT).



Appendix Figure S6

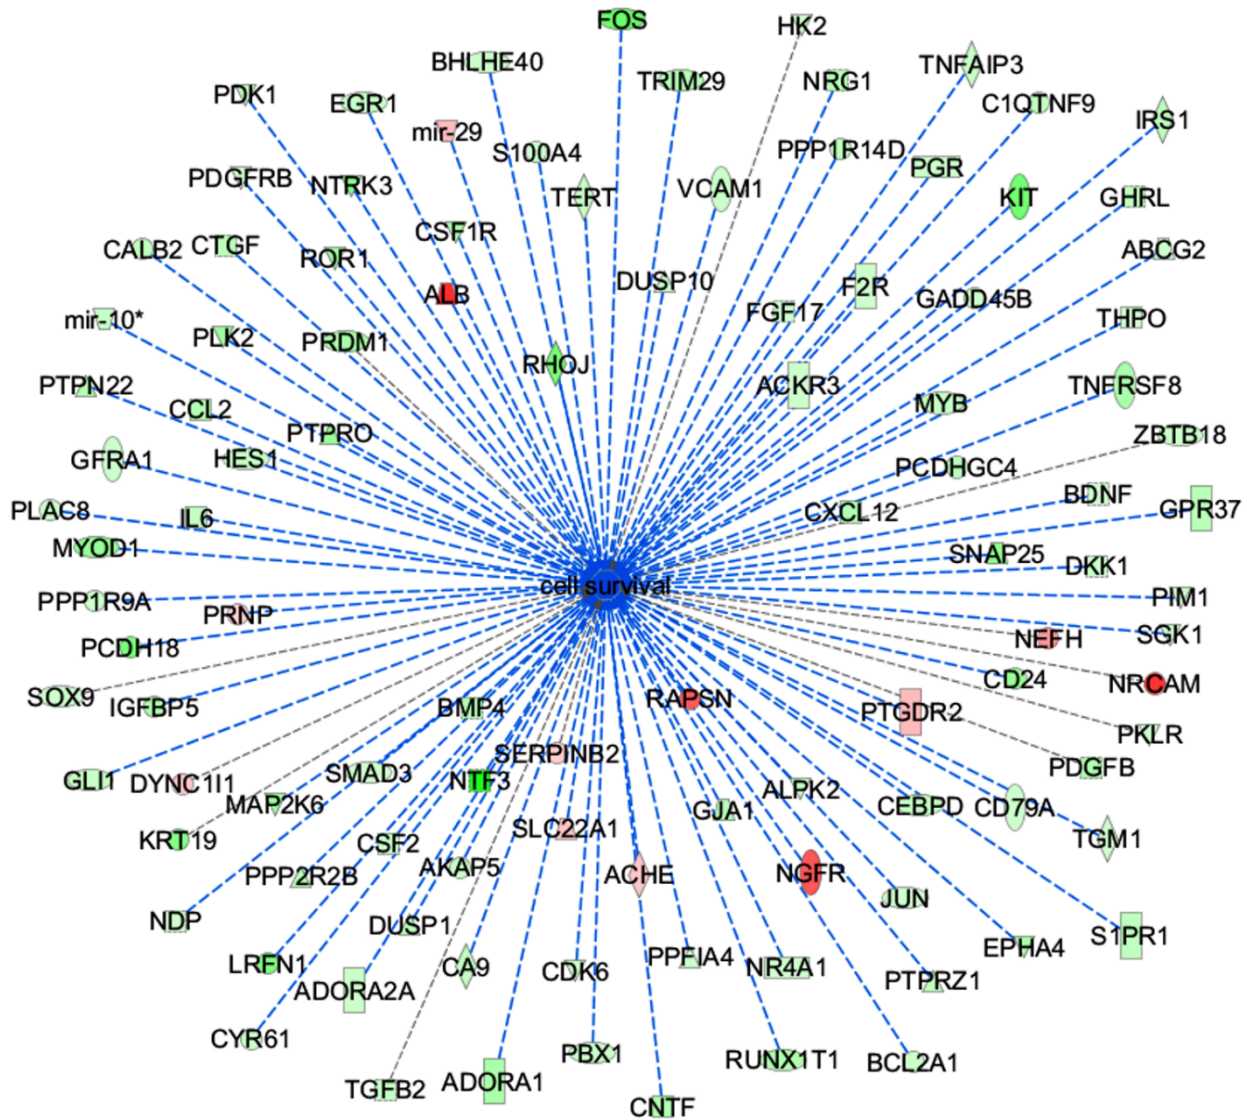

**Appendix Figure S6:** Ingenuity pathway analysis (IPA) of differentially-expressed genes leading to the decreased cell survival seen in AML cells treated for 24h with GW9662 compared with control, vehicle-treated cells. Genes in green were down-regulated while genes in red were up-regulated, with darker colors indicating a more significant change.

Appendix Figure S7

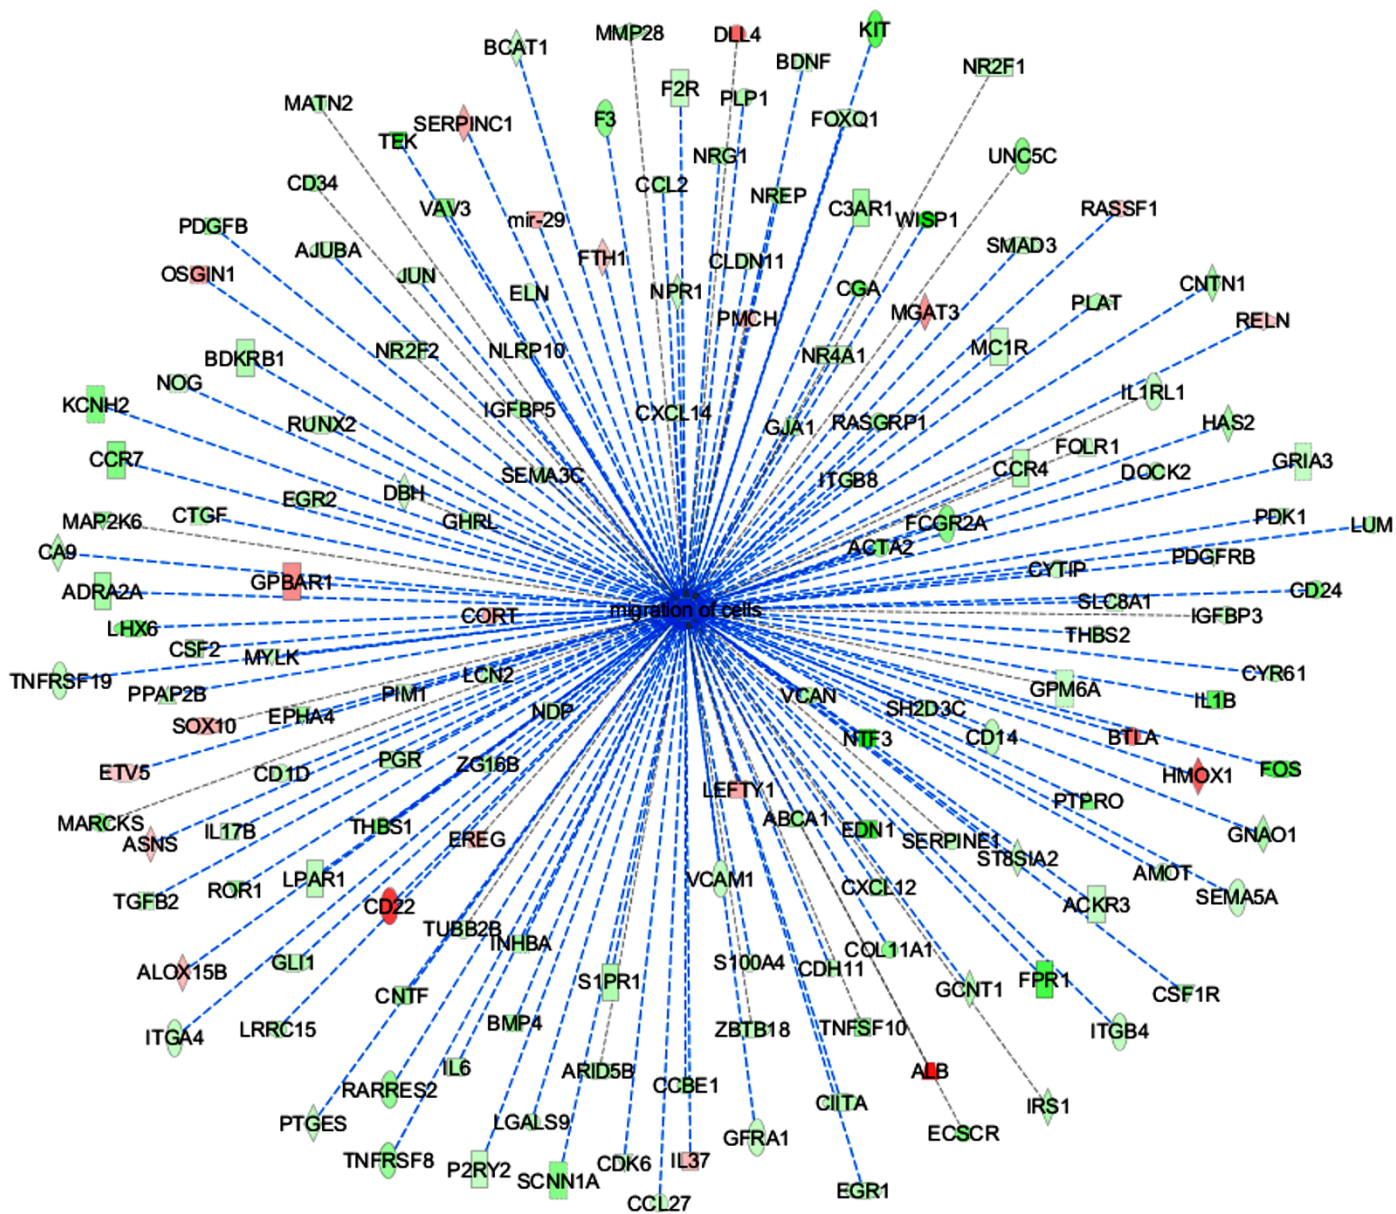

**Appendix Figure S7:** Ingenuity pathway analysis (IPA) of differentially-expressed genes leading to the decreased migration of cells seen in AML cells treated for 24h with GW9662 compared with control, vehicle-treated cells. Genes in green were down-regulated while genes in red were up-regulated, with darker colors indicating a more significant change.

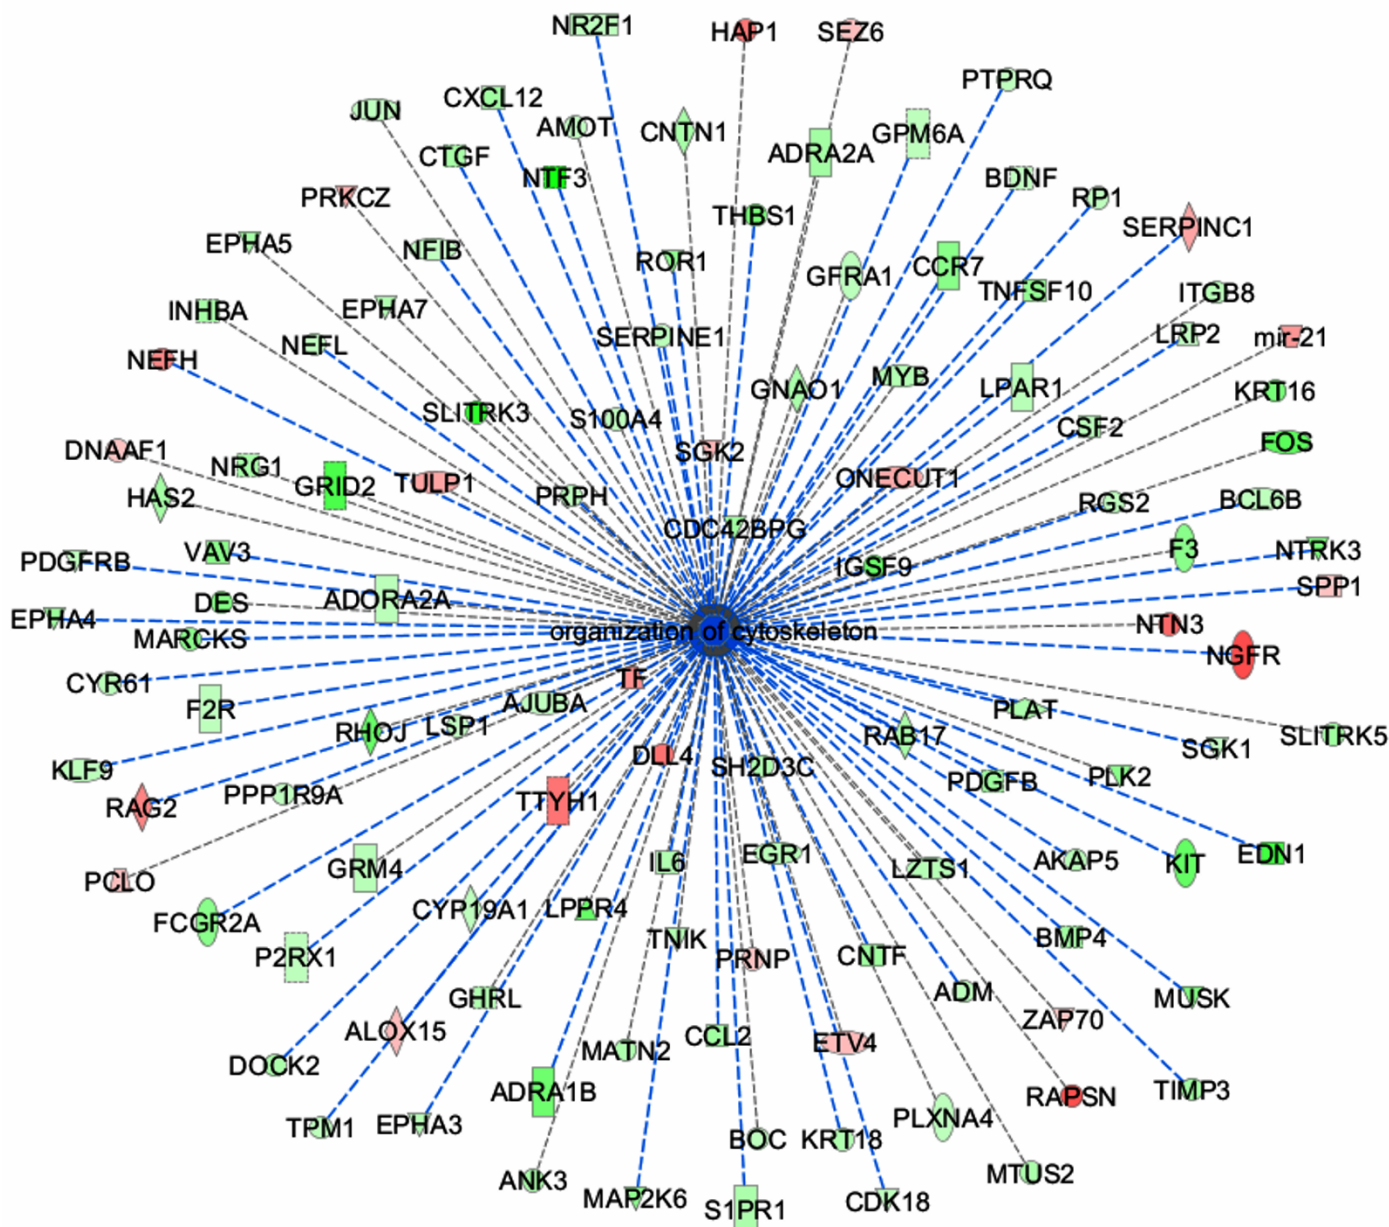

**Appendix Figure S8:** Ingenuity pathway analysis (IPA) of differentially-expressed genes leading to the decreased organization of cytoskeleton seen in AML cells treated for 24h with GW9662 compared with control, vehicle-treated cells. Genes in green were down-regulated while genes in red were up-regulated, with darker colors indicating a more significant change.

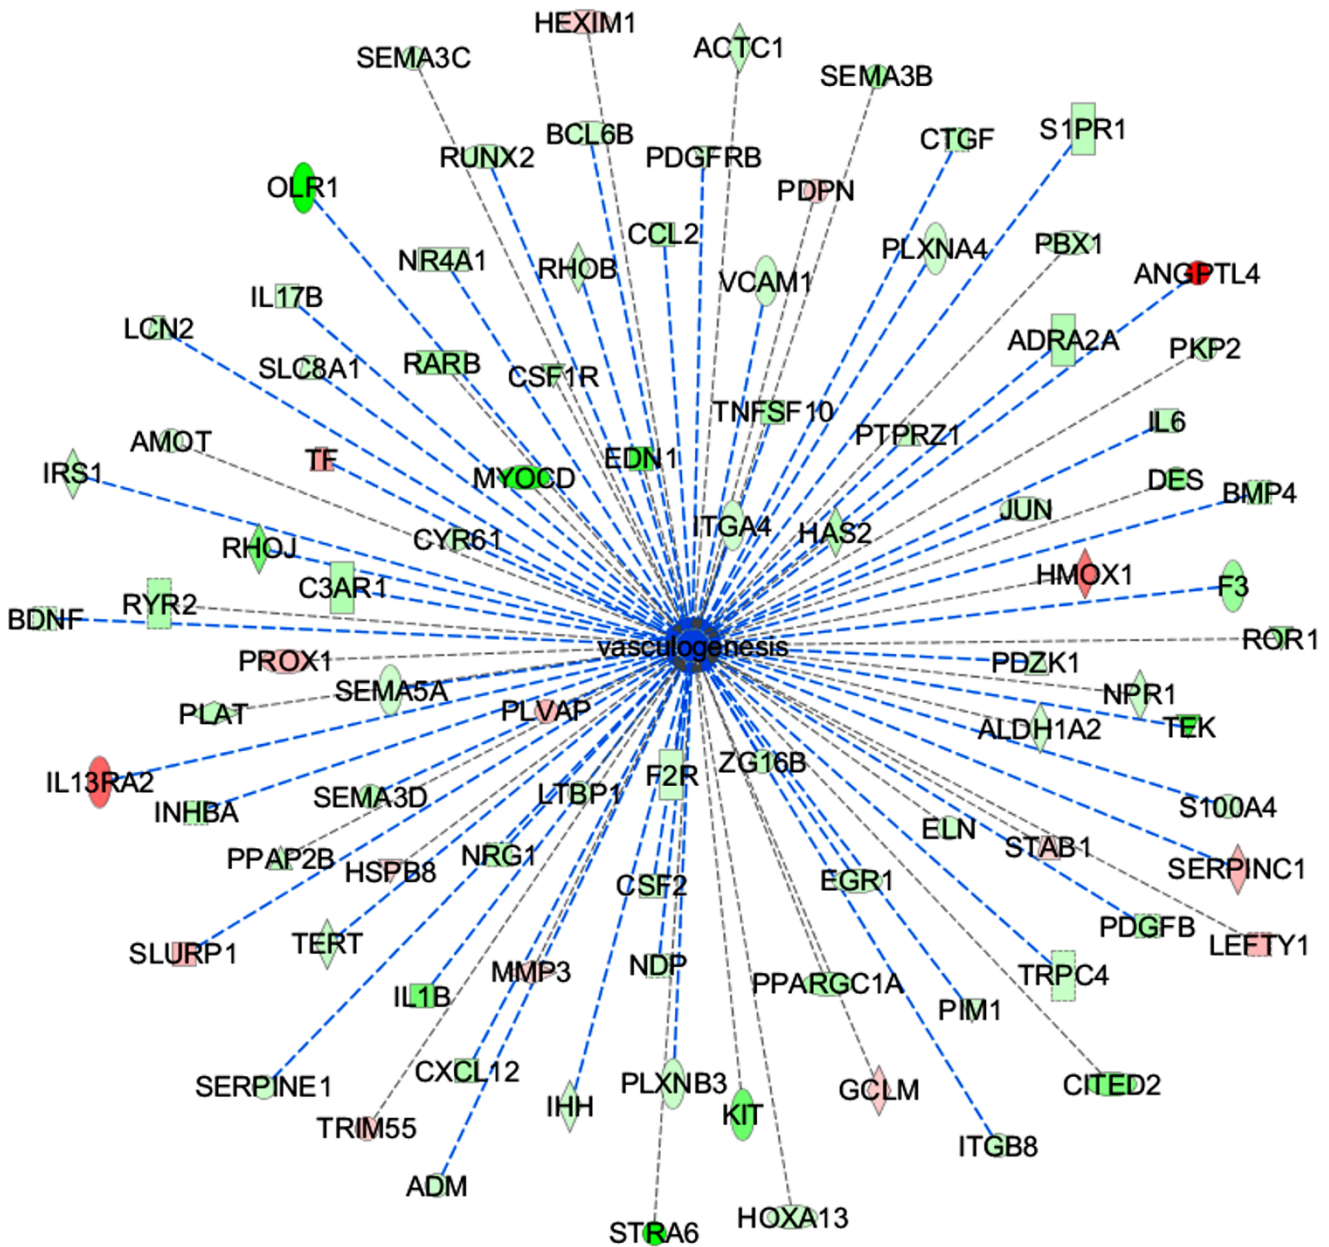

**Appendix Figure S9:** Ingenuity pathway analysis (IPA) of differentially-expressed genes leading to the decreased vasculogenesis cell survival seen in AML cells treated for 24h with GW9662 compared with control, vehicle-treated cells. Genes in green were down-regulated while genes in red were up-regulated, with darker colors indicating a more significant change.

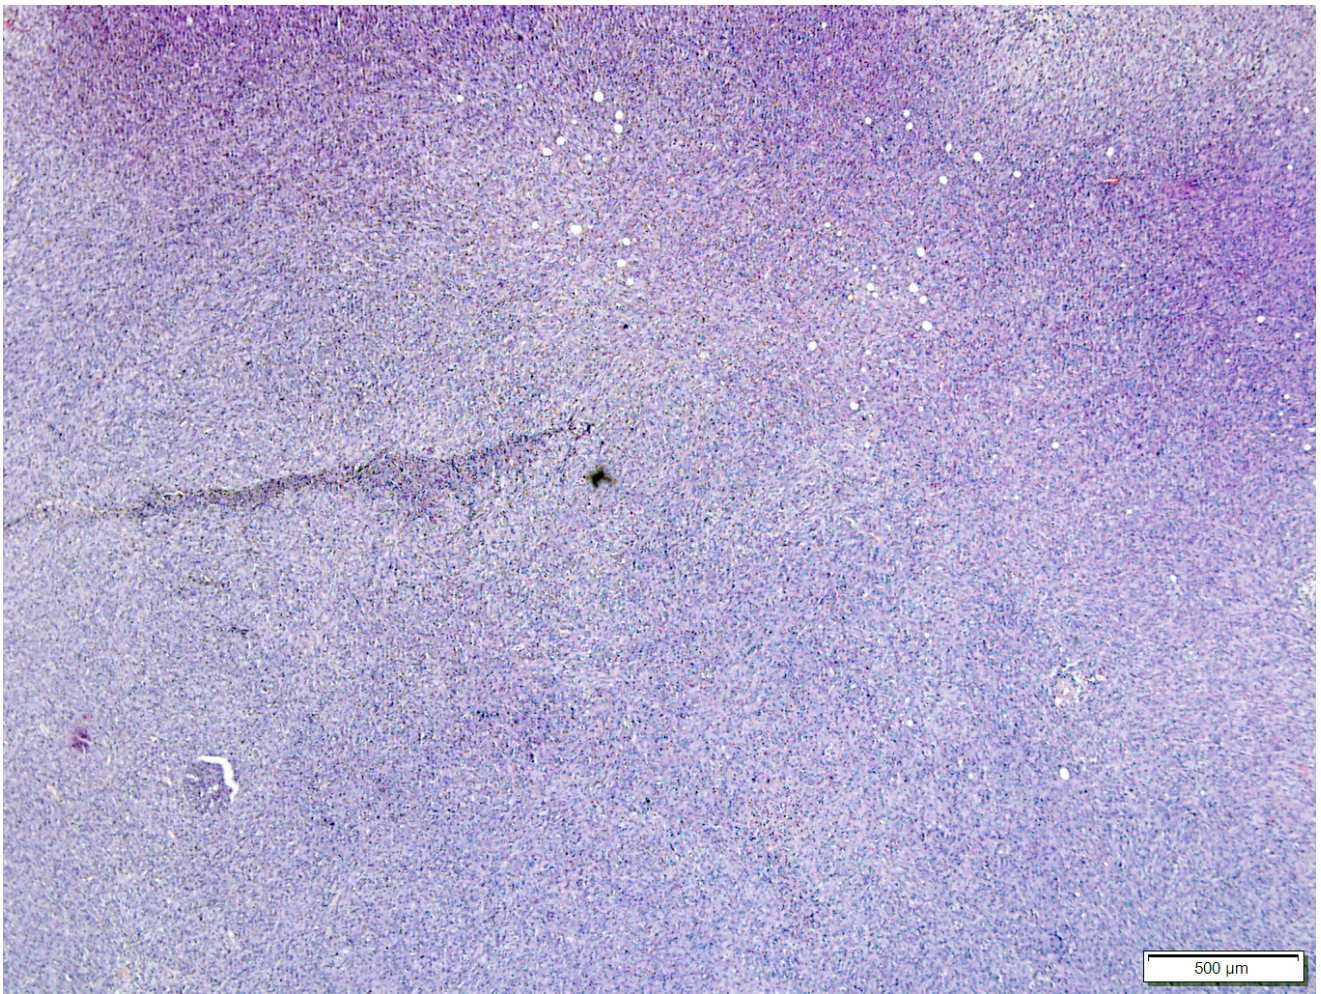

**Appendix Figure S10:** Representative low magnification photograph of T5-Xn, demonstrating the general composition of the Xn. Most of the tumor is seen to consist of dense masses of un-differentiated small hyperchromatic cells, alongside blood vessels, adipocytes and myoid areas.

## Oil-Red-O

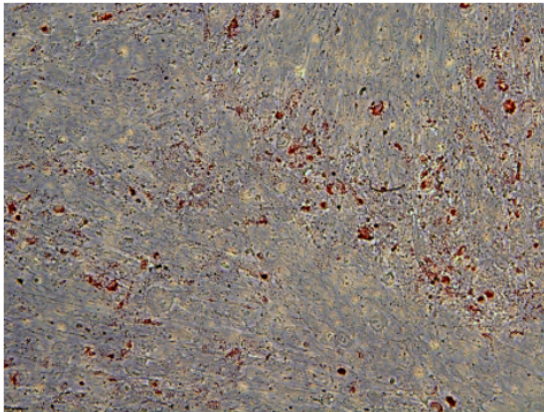

## Alizarin red

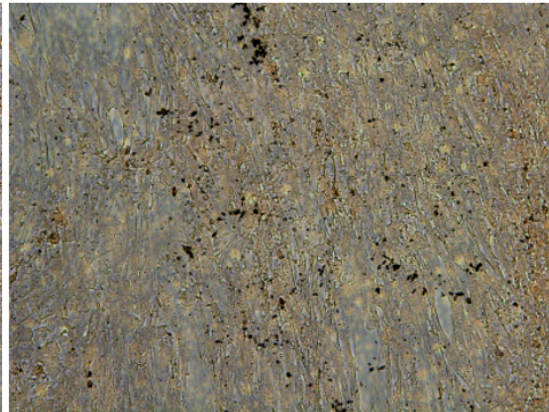

**Appendix Figure S11:** Multipotent mesenchymal stromal cells (MSCs) demonstrating multipotency towards the adipogenic and osteogenic lineages, as manifested by the positive Oil-red-O (left) and Alizarin red (right) stainings. Scale bar: 500  $\mu$ m.



## Supplementary tables

Appendix Table S1

| <b>Gene symbol</b> | <b>Function</b> | <b>Fold change</b> |
|--------------------|-----------------|--------------------|
| <i>FABP4</i>       | AML phenotype   | 152.52             |
| <i>FABP5</i>       | AML phenotype   | 12.17              |
| <i>FGF2</i>        | AML phenotype   | 3.4                |
| <i>PLIN2</i>       | AML phenotype   | 3.12               |
| <i>SERPINH1</i>    | AML phenotype   | 3.11               |
| <i>SERPINE1</i>    | AML phenotype   | 2.08               |
| <i>PPARGC1A</i>    | AML phenotype   | 2.04               |
| <i>VEGFA</i>       | AML phenotype   | 1.94               |
| <i>SERPINF1</i>    | AML phenotype   | -1.91              |
| <i>TJP1</i>        | AML phenotype   | -2.24              |
| <i>WNT5A</i>       | AML phenotype   | -5.4               |
| <i>ABCG2</i>       | Tumor growth    | 3.65               |
| <i>CCND1</i>       | Tumor growth    | 3.29               |
| <i>BIRC5</i>       | Tumor growth    | 2.63               |
| <i>FOSL1</i>       | Tumor growth    | 2.58               |
| <i>CDC42</i>       | Tumor growth    | 2.42               |
| <i>CDK5</i>        | Tumor growth    | 2.35               |
| <i>KRAS</i>        | Tumor growth    | 2.05               |
| <i>TP53</i>        | Tumor growth    | -1.89              |
| <i>CASP3</i>       | Tumor growth    | -2.01              |
| <i>EP300</i>       | Tumor growth    | -3.71              |
| <i>TNFSF10</i>     | Tumor growth    | -3.73              |
| <i>CDKN1C</i>      | Tumor growth    | -4.2               |

|               |                            |       |
|---------------|----------------------------|-------|
| <i>FKBP4</i>  | mTOR pathway               | 7.2   |
| <i>PTEN</i>   | mTOR pathway               | 2.42  |
| <i>PRKAA2</i> | mTOR pathway               | 1.95  |
| <i>AKT2</i>   | mTOR pathway               | -2.08 |
| <i>PDPK1</i>  | mTOR pathway               | -2.29 |
| <i>INSR</i>   | mTOR pathway               | -2.37 |
| <i>IRS2</i>   | mTOR pathway               | -3.16 |
| <i>AKT1</i>   | mTOR pathway               | -3.54 |
| <i>IRS1</i>   | mTOR pathway               | -4.37 |
| <i>CEBPB</i>  | Transcriptional regulation | 2.39  |
| <i>CEBPD</i>  | Transcriptional regulation | 1.97  |
| <i>MED6</i>   | Transcriptional regulation | 1.81  |
| <i>CREB1</i>  | Transcriptional regulation | -1.72 |
| <i>PLAGL1</i> | Transcriptional regulation | -2.05 |
| <i>STAT3</i>  | Transcriptional regulation | -2.11 |
| <i>TRRAP</i>  | Transcriptional regulation | -2.15 |
| <i>TBP</i>    | Transcriptional regulation | -2.19 |
| <i>MECP2</i>  | Transcriptional regulation | -2.3  |
| <i>EGR1</i>   | Transcriptional regulation | -3.66 |

**Appendix Table S1:** Ingenuity pathway analysis (IPA) of PPARG-dependent genes demonstrating significant change between T1-Xn and T5-Xn according to cellular functions.

Appendix Table S2

| Gender | Age | Histology                                     | HMB-45 | $\alpha$ SMA | Features             |
|--------|-----|-----------------------------------------------|--------|--------------|----------------------|
| F      | 27  | Triphasic                                     | NA     | NA           | TSC-related          |
| F      | 19  | Triphasic                                     | +      | +            |                      |
| F      | 66  | Epithelioid                                   | +      | +            | Atypical, aggressive |
| F      | 69  | Blood vessel predominant, fat and muscle poor | +      | NA           |                      |
| F      | 36  | Muscle predominant, fat poor                  | +      | +            |                      |
| M      | 64  | Fat predominant                               | +      | +            | Retroperitoneal AML  |
| F      | 75  | Triphasic                                     | +      | NA           |                      |

**Appendix Table S2:** Summary of primary AML specimens used in this work. F, female; M, male; NA, not available; TSC, Tuberous Sclerosis Complex.

Appendix Table S3

| GO term                          | FDR      | Count |
|----------------------------------|----------|-------|
| Cell motion                      | 6.47E-05 | 78    |
| Regulation of blood vessel size  | 3.85E-04 | 19    |
| Regulation of angiogenesis       | 1.45E-03 | 20    |
| Cell projection morphogenesis    | 1.55E-03 | 46    |
| Regulation of cell proliferation | 2.70E-03 | 103   |
| Cell morphogenesis               | 2.70E-03 | 59    |
| Cell-cell adhesion               | 1.81E-02 | 47    |
| Cell fate commitment             | 3.14E-02 | 29    |

**Appendix Table S3:** Enriched GO (Gene ontology) functions in AML cells treated for 24h with GW9662.

Appendix Table S4

| Upstream regulator | Z-score | p-Value  |
|--------------------|---------|----------|
| TGFB1              | -4.026  | 7.30E-37 |
| NFkB               | -3.535  | 3.36E-11 |
| EDN1               | -3.431  | 5.87E-08 |
| Ap1                | -3.094  | 3.53E-05 |
| PDGF BB            | -3.025  | 6.83E-18 |
| Vegf               | -3.004  | 4.57E-11 |
| CTNNB1             | -2.951  | 5.89E-20 |
| LEP                | -2.711  | 2.02E-06 |
| PTK2               | -2.383  | 3.78E-05 |
| TGFBR1             | -2.381  | 5.48E-05 |
| TGFB3              | -2.291  | 5.70E-12 |
| LEPR               | -2.219  | 4.23E-04 |
| Pdgf complex       | -2.17   | 6.04E-09 |
| PGF                | -2.158  | 3.46E-06 |
| ERK1/2             | -2.13   | 3.46E-11 |
| SMAD3              | -2.086  | 2.83E-21 |
| Let-7              | 2.168   | 4.48E-02 |
| KLF2               | 2.178   | 6.54E-07 |
| SOCS1              | 2.236   | 3.45E-02 |

**Appendix Table S4:** Ingenuity pathway analysis (IPA) demonstrating significantly changed upstream regulators in in AML cells treated with GW9662 compared with control, vehicle-treated cells. Positive Z-scores represent activated upstream regulators, while negative Z-scores represent inhibited upstream regulators.

Appendix Table S5

| Figure    | p-value                                                                                                                                                     |
|-----------|-------------------------------------------------------------------------------------------------------------------------------------------------------------|
| <b>1A</b> | p(T2)= 2.66E-07;<br>P(T3)=0.046<br>p(T4)=0.077                                                                                                              |
| <b>4A</b> | p(UMB,86.5)=0.0001<br>p(UMB, 27.0)=8.84E-13<br>p(UMB,13.1)=1.32E-08<br>p(SV7, 83.9)= 0.001<br>p(SV7,83.3)=2.82E-06<br>p(T4,82.9)= 0.007<br>p(T4,68.1)=0.003 |
| <b>4D</b> | p=0.00007                                                                                                                                                   |
| <b>4G</b> | p(SV7)=5.59E-05;<br>p(UMB)=0.00023<br>p(T4)= 0.007;<br>p(AK)=0.003                                                                                          |
| <b>4H</b> | p(266.7)= 2.91E-06;<br>p(297.2)= 0.036<br>p(331.0)=0.047                                                                                                    |
| <b>5B</b> | p(48h, 2.6)=0;<br>p(96h, 2.1)=0.001<br>p(48h, 2.1)=0.013;<br>p(96h, 2.4)=0.007                                                                              |
| <b>6A</b> | p(7)= 0.0385;<br>p(11)=0.00004<br>p(15)=0.0001                                                                                                              |
| <b>6D</b> | p=0.018                                                                                                                                                     |
| <b>6E</b> | p=0.005                                                                                                                                                     |

| Figure    | p-value                                                                                                                                                                                                                                                                                |
|-----------|----------------------------------------------------------------------------------------------------------------------------------------------------------------------------------------------------------------------------------------------------------------------------------------|
| <b>6F</b> | p=0.004                                                                                                                                                                                                                                                                                |
| <b>7D</b> | p(UMB,0.55)= 0.0009;<br>p(SV7,0.23)=0.0006<br>p(T5,0.33)=0.0196;<br>p(UMB,0.37)=0.00004<br>p(SV7, 0.52)=0.003;<br>p(T5,0.11)=0.0003                                                                                                                                                    |
| <b>8C</b> | p(SIX2,10.6)=0.033;<br>p(OSR1,21.7)=0.049<br>p(PAX2,4.8)=0.0025;<br>p(CITED1,20.2)=0.0134<br>p(FOXD1, 3.6)=0.0113;<br>p(SIX2,0.1)=0.0001<br>p(PAX2, UMB)=0.0001;<br>p(PAX2, SV7)=0.0001<br>p(CITED1, 0.2)=0.0091;<br>p(FOXD1,UMB)=0.0001<br>p(FOXD1,SV7)=0.0006;<br>p(PAX2,0.1)=0.0001 |
| <b>8D</b> | p=0.0295                                                                                                                                                                                                                                                                               |
| <b>8E</b> | p(CD73)= 0.0039;<br>p(CD90)=0.011<br>p(CD105)=0.0003                                                                                                                                                                                                                                   |
| <b>S4</b> | p(T4 vs. UMB)= 0.0004;<br>p(T5 vs. T4)= 0.0098                                                                                                                                                                                                                                         |
| <b>S6</b> | p(75.0)=0.00096;<br>p(85.5)=2.6E-05<br>p(53.9)=3.31E-07;<br>p(52.5)=1.69E-08<br>p(82.1)=0.0016;<br>p(79.8)=0.0003                                                                                                                                                                      |
| <b>S7</b> | p=0.0499                                                                                                                                                                                                                                                                               |
| <b>S8</b> | p=1.16E-07                                                                                                                                                                                                                                                                             |

**Appendix Table S5:** p-values obtained in all statistical analyses carried out in this work.

Appendix Table S6

| Target         | Manufacturer              | Catalog number | Dilution                |
|----------------|---------------------------|----------------|-------------------------|
| HLA            | Abcam                     | ab52922        | 1:200                   |
| $\alpha$ -SMA  | Dako                      | IR611          | 1:100                   |
| CD31           | Dako                      | M0823          | 1:100                   |
| HMB-45         | Dako                      | M0634          | 1:100                   |
| PPARG          | Santa Cruz Biotechnology  | sc-7196        | IHC/IF:1:50<br>WB:1:200 |
| Phospho-S6     | Cell Signaling Technology | 2211           | 1:400                   |
| $\beta$ -actin | Cell Signaling Technology | 4970s          | IF:1:200<br>WB:1:1,000  |

**Appendix Table S6:** Primary antibodies used in immunohistochemical and immunofluorescent stainings and western blot (IHC, IF and WB, respectively).



Appendix Table S7

| <b>Antibody</b>                    | <b>Manufacturer</b> | <b>Catalog number</b> | <b>Dilution</b> |
|------------------------------------|---------------------|-----------------------|-----------------|
| Alexa Fluor 488 donkey anti-rabbit | Invitrogen          | A-11008               | 1:1,200         |
| Alexa Fluor 550 donkey anti-mouse  | Invitrogen          | A-31570               | 1:1,200         |

**Appendix Table S7:** Secondary antibodies used in immunohistochemical and immunofluorescent stainings.

| <b>Antibody</b>              | <b>Manufacturer</b> | <b>Catalog number</b> |
|------------------------------|---------------------|-----------------------|
| Mouse anti human CD14 (FITC) | BD biosciences      | 555397                |
| Mouse anti human CD73 (PE)   | BD biosciences      | 550257                |
| Mouse anti human CD90 (PE)   | BD biosciences      | 562385                |
| Mouse anti human CD31 (FITC) | eBioscience         | 11-0319-41            |
| Mouse anti human CD45 (APC)  | eBioscience         | 17-9459-41            |
| Mouse anti human CD105 (APC) | eBioscience         | 17-1057-41            |
| Mouse anti human NCAM1 (PE)  | eBioscience         | 12-0567-41            |
| Mouse anti human CD34 (FITC) | IQ Products         | IQP-144F50            |

**Appendix Table S8:** Antibodies used for flow cytometry experiments.
